# Supplementary material for: NiOOH@Cobalt copper carbonate hydroxide nanorods as bifunctional electrocatalysts for highly efficient water and hydrazine oxidation
Source: Royal Society of Chemistry journal article supplement (doi:10.1039/d2nj00518b), 2022-01-01
Supplement: d2nj00518b1.pdf [file d2nj00518b1.pdf]

## Supplementary Materials

### NiOOH@Cobalt Copper Carbonate Hydroxide Nanorods as Bifunctional Catalysts for Highly Efficient Water and Hydrazine Oxidation

Bin Li,<sup>a, b</sup> Kefeng Wang,<sup>b\*</sup> Jingxiao Ren,<sup>b</sup> Peng Qu<sup>a, b</sup>

<sup>a</sup> College of Chemistry, Zhengzhou University, Zhengzhou 450002, China

<sup>b</sup> Henan Engineering Center of New Energy Battery Materials, College of Chemistry and Chemical Engineering, Shangqiu Normal University, Shangqiu 476000, Henan, China

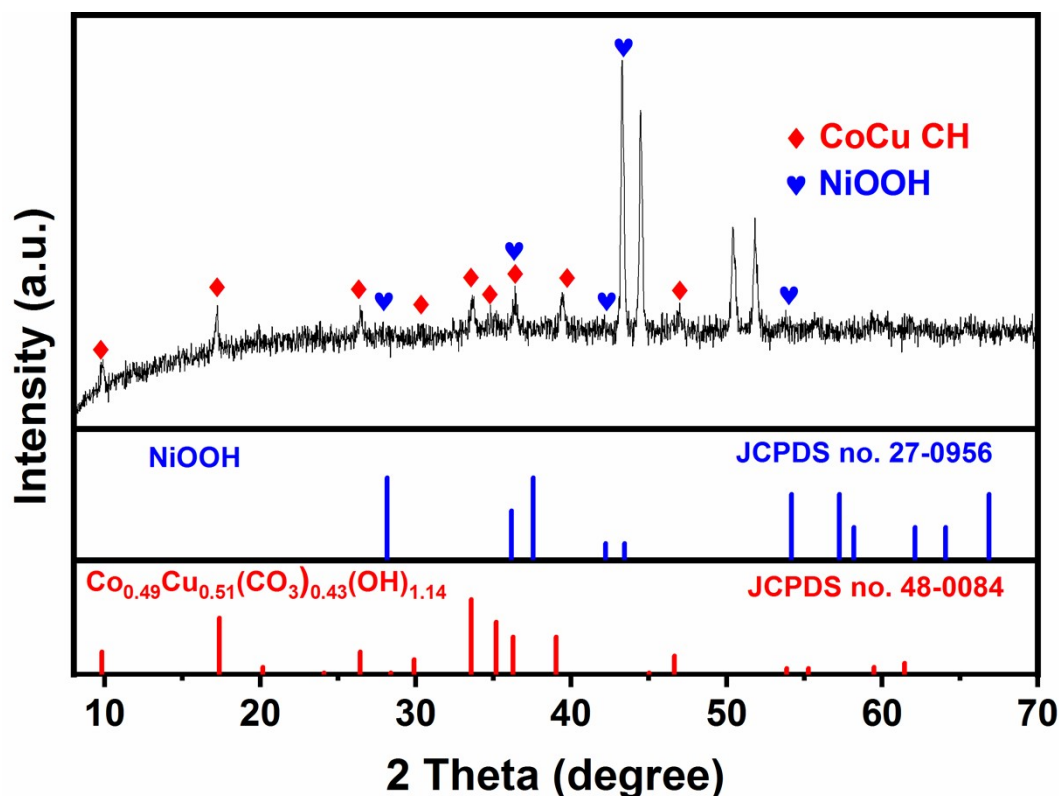

**Figure S1** XRD pattern of NiOOH@CoCu CH powder with the deposition time of NiOOH prolonged to 30 min, and the standard patterns of orthorhombic cobalt copper carbonate hydroxide (JCPDS no. 48-0084) and nickel oxide hydroxide (JCPDS no. 27-0956).

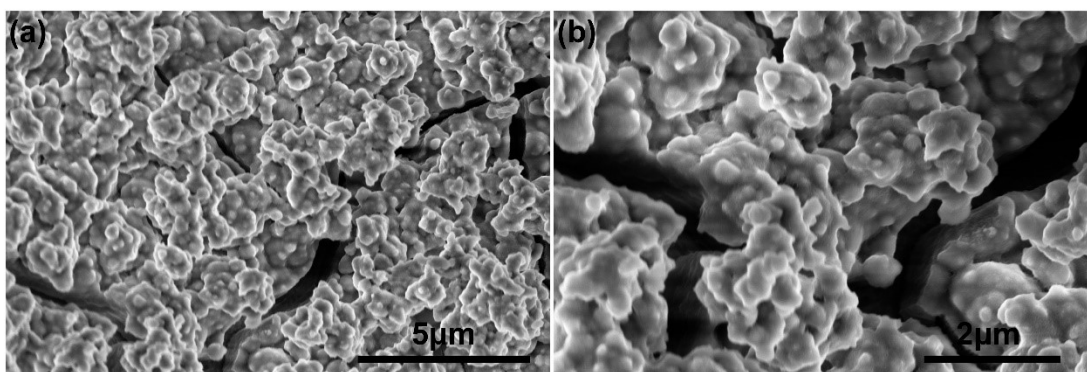

**Figure S2** SEM images of NiOOH directly deposited on nickel foam (NiOOH/NF)

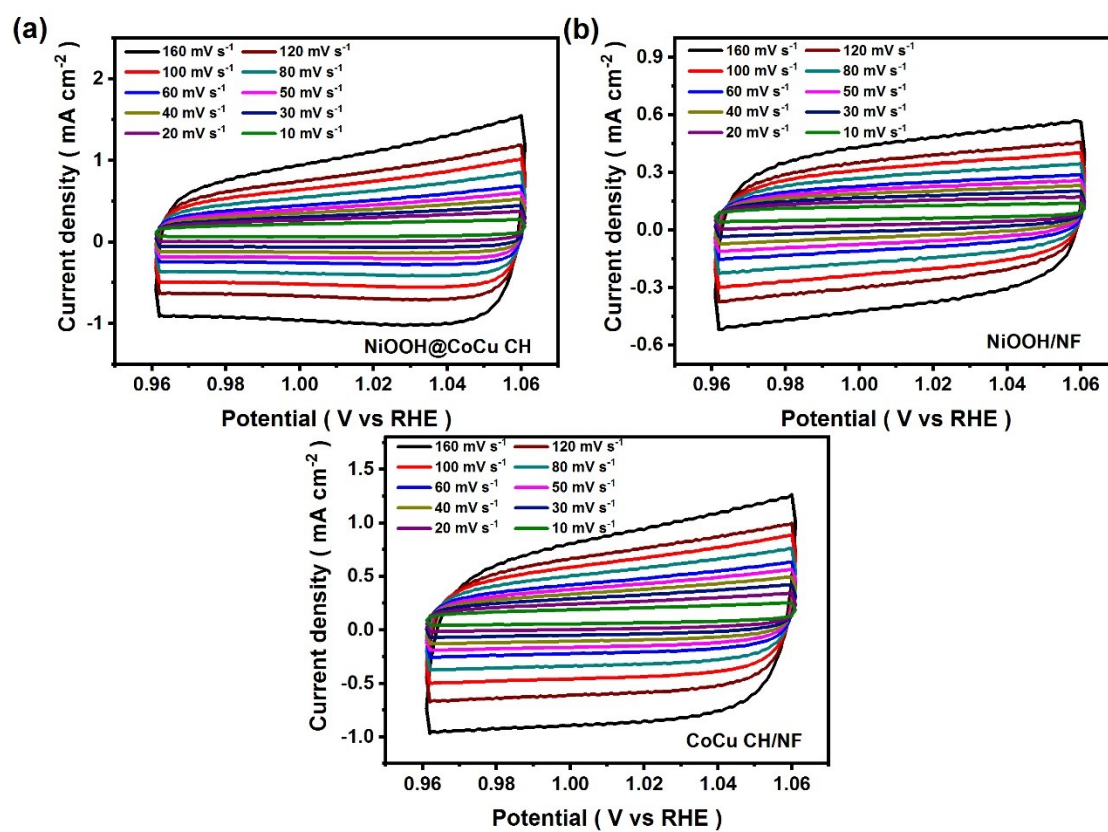

**Figure S3** Electrochemical measurements for OER: cyclic voltammogram (CV) curves at different scan rates for OER: (a) NiOOH@CoCu CH, (b) NiOOH/NF and (c) CoCu CH/NF.

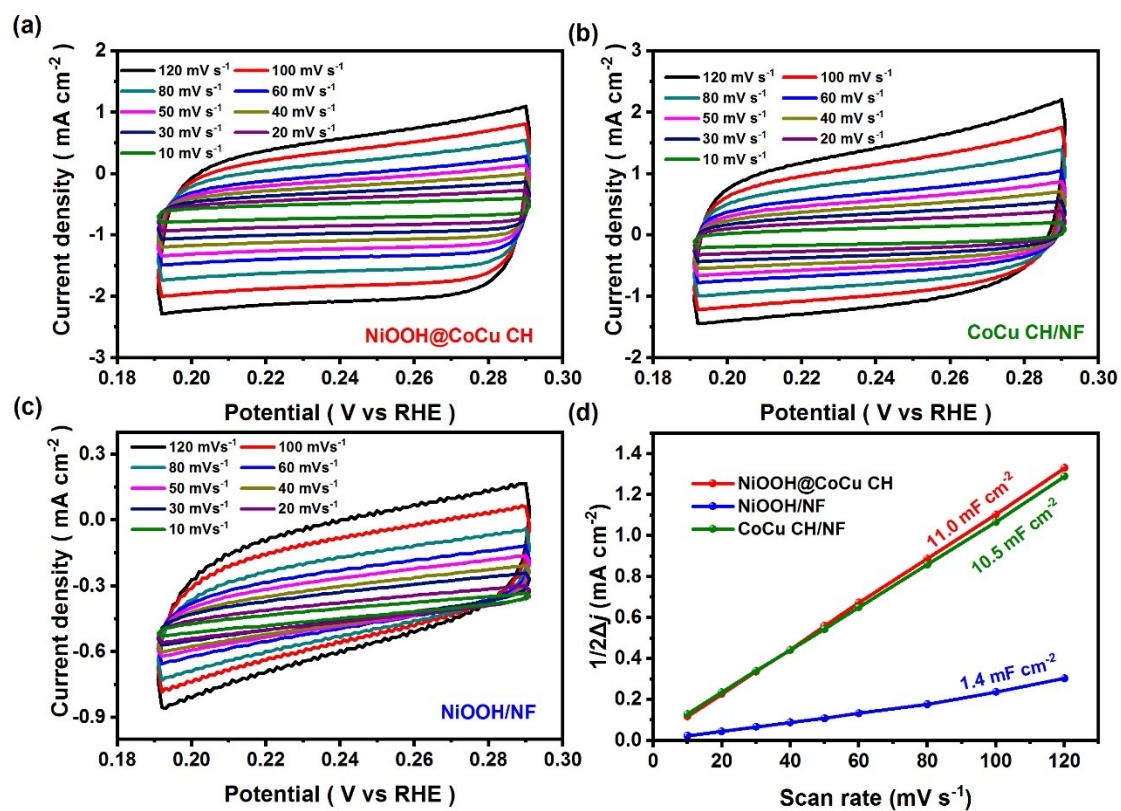

**Figure S4** Electrochemical measurements for HER: CV curves of NiOOH@CoCu CH (a), CoCu CH/NF (b) and NiOOH/NF (b) at different scan rates. (d) Plots curve of  $1/2$  of the difference in the current density at 0.24 V vs RHE ( $1/2\Delta j$ ) against scan rate, and the slopes enable the estimation of the electrochemical double layer capacitance ( $C_{dl}$ ) values.

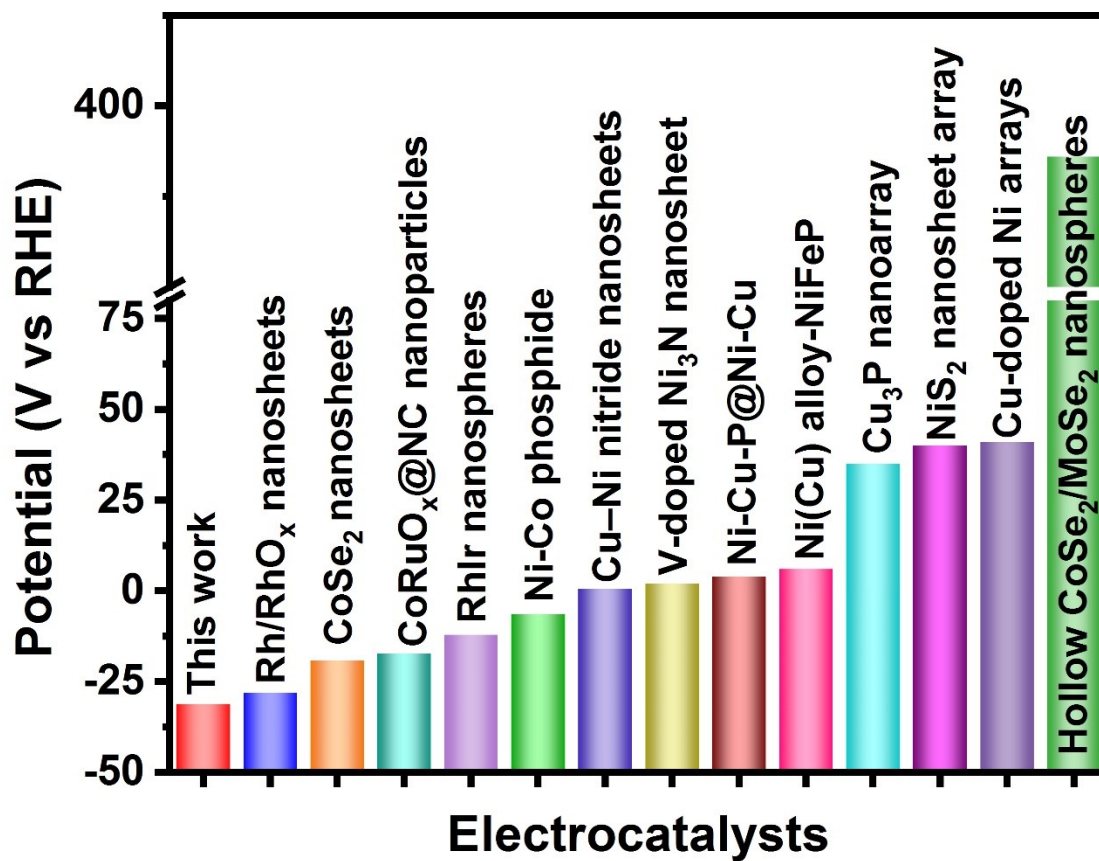

**Figure S5** Comparison of HzOR performance of different electrocatalysts in terms of the potential to deliver a current density of  $10 \text{ mA cm}^{-2}$  in 1 M KOH with 0.5 M hydrazine.

**Table S1** Electrocatalytic OER performance of NiOOH@CoCu CH compared with other transition metal oxides and hydroxides tested in 1 M KOH electrolyte.

| Catalysts                                                                      | Overpotential<br>( $j=10 \text{ mA cm}^{-2}$ )<br>(mV) | Tafel slope<br>( $\text{mV dec}^{-1}$ ) | Ref.                                            |
|--------------------------------------------------------------------------------|--------------------------------------------------------|-----------------------------------------|-------------------------------------------------|
| NiOOH@CoCu CH                                                                  | 263                                                    | 43.2                                    | This work                                       |
| Co(OH) <sub>2</sub> /NF                                                        | 230                                                    | 43                                      | Electrochim. Acta, 2022, 411, 1400              |
| Co <sub>3</sub> Fe <sub>1</sub> -LDH/rGO/<br>NF                                | 250                                                    | 43                                      | Int. J. Hydrogen Energy, 2021, 46, 27529-27542  |
| NiCo–NiCoO <sub>2</sub> @Cu <sub>2</sub> O<br>on CF                            | 327                                                    | 118                                     | Int. J. Hydrogen Energy, 2021, 46, 18936-18948  |
| Cu@CoFe LDH                                                                    | 240                                                    | 44.4                                    | Nano Energy, 2017, 41, 327–336                  |
| Cobalt carbonate<br>hydroxide<br>mesostructure                                 | 320                                                    | 38.8                                    | Int. J. Hydrogen Energy, 2018, 43, 9635-9643    |
| CuCo <sub>2</sub> O <sub>4</sub> @CQDs                                         | 290                                                    | 64                                      | Inorg. Chem., 2018, 57, 12, 7380–7389           |
| La(CrMnFeCo <sub>2</sub> Ni)O <sub>3</sub>                                     | 325                                                    | 51.2                                    | Adv. Funct. Mater. 2021, 2101632                |
| $\beta$ -NiMoO <sub>4</sub>                                                    | 300                                                    | 53                                      | ACS Appl. Mater. Interfaces 2017, 9, 9640–96530 |
| hierarchical<br>NiMoO <sub>4</sub> –CoMoO <sub>4</sub><br>nanotubes            | 300                                                    | 64                                      | J. Mater. Chem. A, 2015, 3, 22750–22758         |
| Co <sub>3–x</sub> Fe <sub>x</sub> O <sub>4</sub>                               | 294                                                    | 47.3                                    | Dalton Trans., 2022,51, 3137-3145               |
| MoO <sub>2</sub> @MoS <sub>2</sub> @Co <sub>9</sub> S <sub>8</sub><br>nanorods | 310                                                    | 70                                      | App. Surf. Sci., 2021, 543, 148804              |
| Ir-doped Co(OH) <sub>2</sub><br>nanosheets                                     | 262                                                    | 80.2                                    | Dalton Trans., 2022,51, 1527-1532               |
| Co–Fe Oxyphosphide<br>Microtubes                                               | 280                                                    | 53                                      | Adv. Sci. 2019, 6, 1900576                      |
| NiCo <sub>2</sub> O <sub>4</sub> nanosheet<br>array                            | 270                                                    | 59.2                                    | J. Catal., 2018, 357, 238–246                   |
| $\alpha$ -Co(OH) <sub>2</sub>                                                  | 320                                                    | 58                                      | ChemSusChem, 2019, 12, 5300-5309                |
| CoO <sub>x</sub> /CC                                                           | 263                                                    | 56.1                                    | ACS Appl. Energy Mater. 2019, 2, 1977–1987      |

|                                                             |     |      |                                                       |
|-------------------------------------------------------------|-----|------|-------------------------------------------------------|
| Co <sub>2.3</sub> Fe <sub>0.7</sub> O <sub>4</sub> -NSs/CFP | 359 | 34.3 | ACS Appl. Mater. Interfaces 2018, 10, 46, 39809–39818 |
| P/Mo-Co <sub>3</sub> O <sub>4</sub> @CC                     | 265 | 59.4 | Adv. Sci. 2020, 7, 1902830                            |
| CuCo <sub>2</sub> O <sub>4</sub> @CC                        | 288 | 64.2 | J. Colloid Interface Sci., 2020, 576, 476–485         |
| Co(OH) <sub>2</sub> @Ni(OH) <sub>2</sub> /CC                | 330 | 223  | Appl. Surf. Sci., 2019, 479, 1270–1276                |

**Table S2** HER performance of transition metal oxides and hydroxides in 1 M KOH

| Catalysts                                         | Overpotential<br>( $j=10 \text{ mA cm}^{-2}$ )<br>(mV) | Tafel slope<br>(mV dec <sup>-1</sup> ) | Ref.                                                       |
|---------------------------------------------------|--------------------------------------------------------|----------------------------------------|------------------------------------------------------------|
| NiOOH@CoCu CH                                     | 171                                                    | 108                                    | This work                                                  |
| NiO/Co <sub>3</sub> O <sub>4</sub>                | 169.5                                                  | 119                                    | Chem. Commun., 2019, 55, 6515-6518                         |
| NiFe LDH-Co <sub>3</sub> O <sub>4</sub> nanowires | 303                                                    | 79                                     | Catal. Sci. Technol., 2019, 9,2879-2887                    |
| Co(OH) <sub>2</sub> /NF                           | 190                                                    | 70                                     | Electrochim. Acta, 2022, 411, 1400                         |
| NiCoFe layered triple hydroxide nanosheets        | 180                                                    | 78                                     | Sustainable Energy Fuels, 2022,6, 474-483                  |
| NiFe LDH/FeOOH                                    | 181.8                                                  | None                                   | Inorg. Chem. 2021, 60, 17371-17378                         |
| NiCu mixed metal oxid                             | 200                                                    | 120                                    | Electrochim. Acta, 2021, 371, 137837                       |
| NiFe LDH/CeO <sub>x</sub>                         | 154                                                    | 101                                    | ACS Appl. Mater. Interfaces 2018, 10, 35145-35153          |
| Cu@CoFe LDH                                       | 177                                                    | 36.4                                   | Nano Energy, 2017, 41, 327-336                             |
| Graphene-like sheets supported FeCo LDH           | 430                                                    | 122                                    | Chemosphere, 2022, doi: 10.1016/j.chemosphere. 2022.134251 |
| Ni(OH) <sub>2</sub> /Ni/Ti                        | 197                                                    | 88                                     | ChemSusChem, 2018, 11, 948-958                             |
| S-doped NiCo LDH on a stainless steel             | 380                                                    | 69                                     | J. Electroanal. Chem., 2019, 833, 105-112                  |
| CoMn CH/NF                                        | 180                                                    | NA                                     | J. Am. Chem. Soc., 2017, 139, 8320-8328                    |
| CuCo <sub>2</sub> O <sub>4</sub> @CQDs            | 331                                                    | 65                                     | Inorg. Chem., 2018, 57,                                    |



|                                                                              |      |       |                                    |
|------------------------------------------------------------------------------|------|-------|------------------------------------|
|                                                                              |      |       | 12, 7380-7389                      |
| CoCO <sub>3</sub> @NiFe LDH nanowires array                                  | 171  | 168.2 | Mater. Lett., 2020, 277, 128285    |
| MoO <sub>2</sub> @MoS <sub>2</sub> @Co <sub>9</sub> S <sub>8</sub> nanorods  | 160  | 80    | App. Surf. Sci., 2021, 543, 148804 |
| Co-Fe Oxyphosphide Microtubes                                                | 220  | 62    | Adv. Sci. 2019, 6, 1900576         |
| NiCo <sub>2</sub> O <sub>4</sub> nanosheet array                             | ~200 | 71.2  | J. Catal., 2018, 357, 238-246      |
| Co <sub>9</sub> S <sub>8</sub> @NiCo LDH/NF                                  | 168  | 103   | Sci. Bull., 2019, 64, 158-165      |
| Fe <sub>2</sub> O <sub>3</sub> nanocatalysts on N-doped carbon nanomaterials | 245  | 76.6  | J. Power Sources, 2019, 426, 74-83 |

**Table S3** Hydrazine oxidation-assisted hydrogen production performance of different electrode couples in 1 M KOH with 0.5 M hydrazine

| Catalysts                                               | Current density (mA cm <sup>-2</sup> ) | Cell voltage (V) | Ref.                                               |
|---------------------------------------------------------|----------------------------------------|------------------|----------------------------------------------------|
| NiOOH@CoCu CH                                           | 10                                     | 0.087            | This work                                          |
|                                                         | 50                                     | 0.33             |                                                    |
| CoP/Co nanoparticles                                    | 10                                     | 0.26             | J Phys Chem Lett, 2021, 12: 4849-4856.             |
| NiSe nanosheets on Ni Foam                              | 50                                     | 0.47             | ACS Appl. Mater. Interfaces, 2021, 13: 34457-34467 |
| V-doped Ni <sub>3</sub> N nanosheet on Ni foam          | 10                                     | 0.094            | ACS Appl. Mater. Interfaces, 2021, 13: 3881-3890.  |
| Ni(Cu) alloy anchored on amorphous NiFeP                | 10                                     | 0.147            | J. Catal., 2019, 373: 180-189.                     |
| Copper-nickel nitride nanosheets                        | 10                                     | 0.24             | Adv. Energy Mater., 2019, 9: 1900390.              |
| Cu <sub>3</sub> P nanoarray                             | 10                                     | 0.38             | Inorg. Chem. Front., 2017, 4: 420-423.             |
| NiS <sub>2</sub> nanosheet array on Ti mesh             | 10                                     | 0.34             | Mater. Today Energy, 2017, 3: 9-14.                |
| CoSe <sub>2</sub> nanosheets                            | 10                                     | 0.164            | Angew. Chem. Int. Ed. Engl., 2018, 57: 7649-7653.  |
| hollow CoSe <sub>2</sub> /MoSe <sub>2</sub> nanospheres | 10                                     | 0.85             | Chem. Eng. J., 2021, 404: 126529.                  |

|                                                                                       |    |       |                                                      |
|---------------------------------------------------------------------------------------|----|-------|------------------------------------------------------|
| Cu-doped Ni arrays                                                                    | 10 | 0.07  | J. Mater. Chem. A, 2020, 8: 21084-21093.             |
| Rh/RhO <sub>x</sub> nanosheets                                                        | 10 | 0.068 | J. Mater. Chem. A, 2022, doi: 10.1039/D1031TA09391F. |
| RhIr mesoporous nanospheres                                                           | 10 | 0.13  | J. Mater. Chem. A, 2021, 9: 18323-18328.             |
| Ni-Cu-P@Ni-Cu nano-micro dendrite                                                     | 10 | 0.125 | Electrochim. Acta, 2021, 382: 138335.                |
| nickel-cobalt phosphide grown on Ni foam                                              | 10 | 0.127 | Int. J. Hydrogen Energy, 2020, 45: 27000-27011.      |
| CoRuO <sub>x</sub> @NC nanoparticles                                                  | 10 | 0.079 | ACS Sustainable Chem. Eng, 2020, 8: 12089-12099.     |
| CoP nanoparticles embedded into N-doped carbon nanotubes grafted on carbon polyhedron | 10 | 0.89  | ACS Sustainable Chem. Eng, 2019, 7: 10044-10051.     |
| ruthenium single atoms anchored onto of WS <sub>2</sub>                               | 10 | 0.14  | Adv. Funct. Mater., 2022, 2109439.                   |
